# Supplementary material for: Cellulose Nanocrystal-Based Emulsion of Thyme Essential Oil: Preparation and Characterisation as Sustainable Crop Protection Tool
Source: MDPI journal article supplement (doi:10.3390/molecules28237884), 2023-11-30
Supplement: s1 [file s1]

# **Cellulose nanocrystals-based emulsion of thyme essential oil: preparation and characterization as sustainable crop protection tool**

Francesca Baldassarre <sup>1,2 \*</sup>, Daniele. Schiavi <sup>3</sup>, Veronica Di Lorenzo <sup>3</sup>, Francesca Biondo <sup>1</sup>, Viviana Vergaro <sup>1,2</sup>, Gianpiero Colangelo <sup>4</sup>, Giorgio Mariano Balestra <sup>3</sup> and Giuseppe Ciccarella<sup>1,2 \*</sup>

<sup>1</sup> Department of Biological and Environmental Sciences, UdR INSTM of Lecce University of Salento, Via Monteroni, 73100 Lecce, Italy

<sup>2</sup> Institute of Nanotechnology, CNR NANOTEC, Consiglio Nazionale delle Ricerche, Via Monteroni, 73100 Lecce, Italy

<sup>3</sup> Department of Agriculture and Forest Sciences (DAFNE), University of Tuscia, Via S. Camillo de Lellis, snc, 01100 Viterbo, Italy

<sup>4</sup> Department of Engineering for Innovation, University of Salento, Via Monteroni, 73100 Lecce, Italy

## **Supplementary Material**

### **Summary**

**Supplementary figure 1** UV-vis spectra of Th-EO in cream layer and remaining emulsion volume of CNCs@Th-EO NE\_2 formulation after 30 days of storage at room temperature.

**Supplementary table 1** TPC data of nanoemulsions after storage at room temperature and at 4°C.

**Supplementary table 2** DLS parameters of CNCs@Th-EO NE\_1 formulation over time.

**Supplementary figure 2** SEM image of used CNCs

**Supplementary figure 3** TEM images of Th-EO/surfactant micelles in CNCs@Th-EO NE\_1 formulation at different magnification; B is a zoom image of A and D is a zoom image of C.

**Supplementary figure 4**  $\Delta$  Back Scattering % *versus* height (mm) plot of CNCs@Th-EO NE\_1 formulation at T 0 and T 30 days, following Turbiscan LabExpert scanning every 2 hours for 24h.

Supplementary figure 1

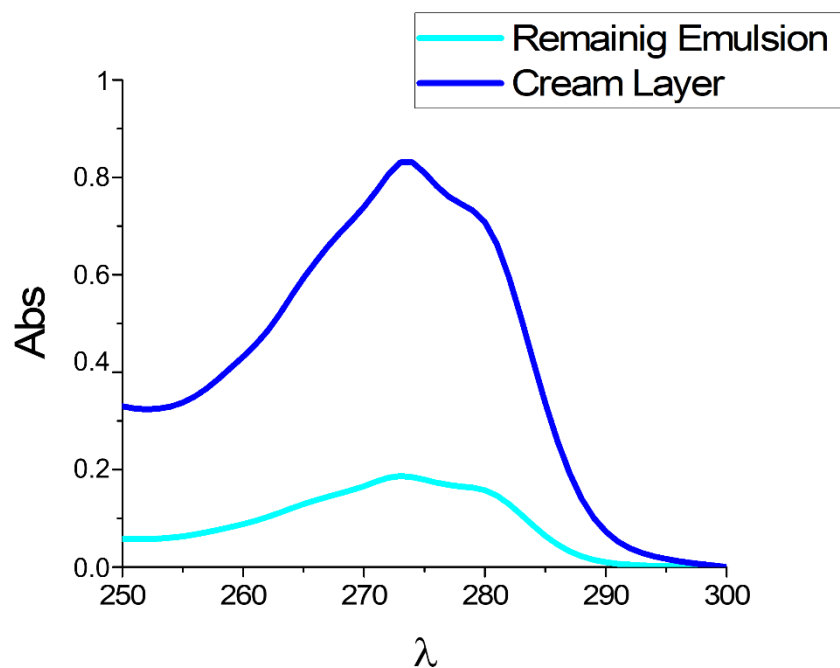

**Figure S1.** UV-vis spectra of Th-EO in cream layer and in remaining emulsion volume of CNCs@Th-EO NE\_2 formulation after 30 days of storage at room temperature.

Supplementary table 1

| Sample             | $\mu\text{g GAE/mg OET}$<br>(RT) | $\mu\text{g GAE/mg OET}$<br>(4°C) |
|--------------------|----------------------------------|-----------------------------------|
| CNCs@Th-EO<br>NE_1 | 236±12                           | 228±17                            |
| CNCs@Th-EO<br>NE_3 | 218±31                           | 226±14                            |
| CNCs@Th-EO<br>NE_4 | 226±14                           | 224±17                            |

**Table S1.** TPC data of nanoemulsions after storage at room temperature and at 4°C. TPC assay was made at the same EO concentration of 20  $\mu\text{g/ml}$  that was determined by UV-vis spectrometric analysis.

Supplementary table 2

| Time (days) | Z-average diameter (nm) | PdI        | ζ-potential |
|-------------|-------------------------|------------|-------------|
| 0 *         | 227±2                   | 0,26±0.012 | -26±0.35    |
| 7           | 230±4                   | 0,23±0.007 | -27,1±0.2   |
| 14          | 227±4                   | 0,23±0.005 | -24,5±0.3   |

**Table S2** .DLS parameters of CNCs@Th-EO NE\_1 formulation after preparation (\*following solvent evaporation), after 7 and 14 days of storage at RT.

Supplementary figure 2

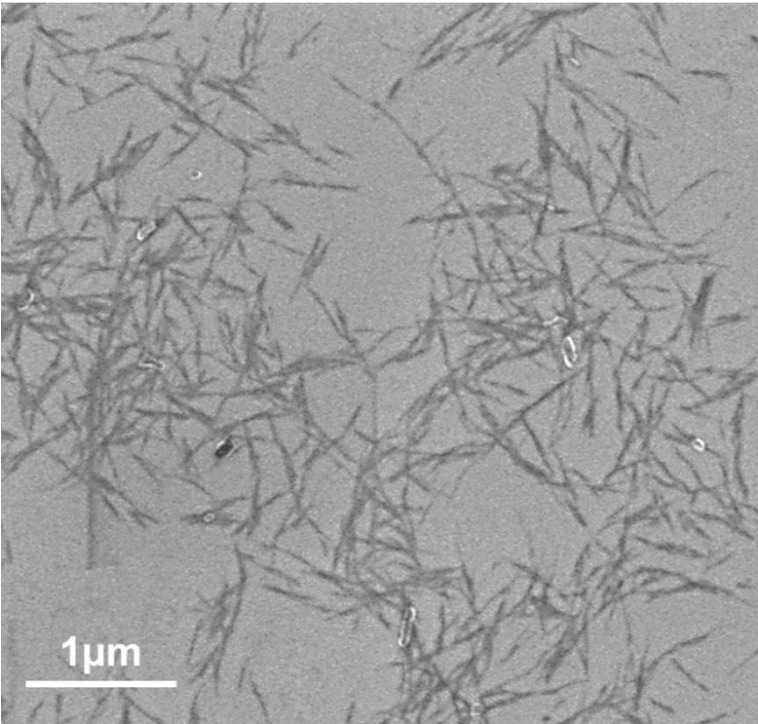

**Figure S2.** EM image of CNCs in 6% w/v aqueous gel from CelluloseLab.

Supplementary figure 3

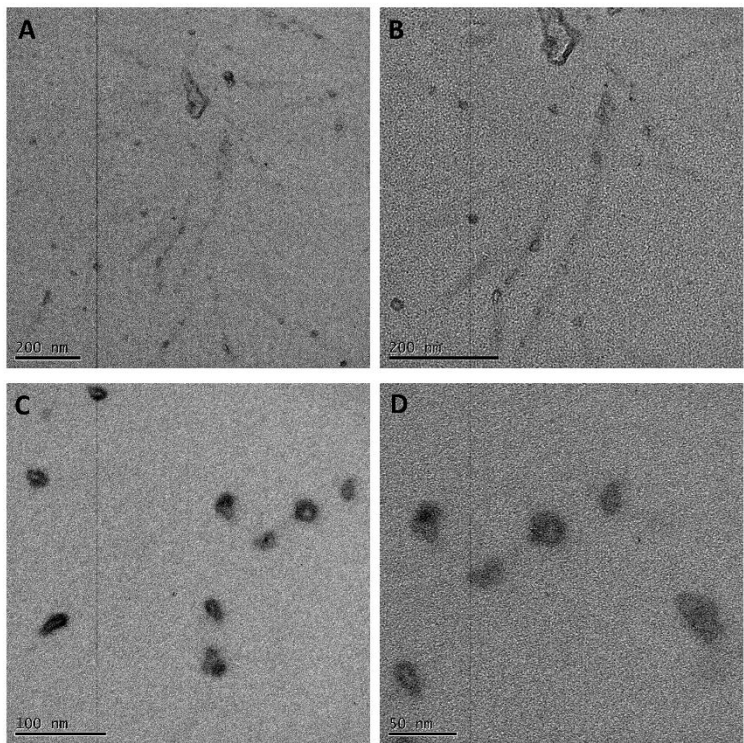

**Figure S3.** TEM images of Th-EO/surfactant micelles in CNCs@Th-EO NE<sub>1</sub> formulation at different magnification; B is a zoom image of A and D is a zoom image of C. 1 A-B images showed also the presence of CNCs.

Supplementary figure 4

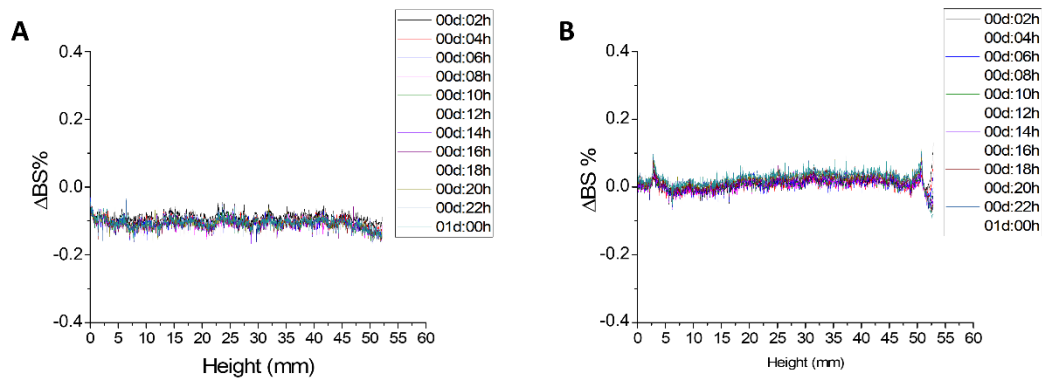

**Figure S4.**  $\Delta BS\%$  versus height (mm) plot of CNCs@Th-EO NE<sub>1</sub> formulation at T 0 (A) and T 30 days (B), following Turbiscan LabExpert scanning every 2 hours for 24h.
